# Supplementary material for: Mussels and canopy-forming algae as ecosystem engineers: their contribution to community organization in the rocky sublittoral
Source: Frontiers journal article supplement (doi:10.3389/fmars.2022.929899), 2022-08-04
Supplement: Table_1.DOCX [file Table_1.DOCX]

**SUPPLEMENTARY MATERIAL 1.**

**Table 1. Fucus Biomass**

*PERMANOVA table of results* Unique

Source df SS MS Pseudo-F P(perm) perms

Re 1 6,8263 6,8263 2,0165 0,1633 9823

Res 38 128,64 3,3852

Total 39 135,46

**Table 2. Mytilus Biomass**

*PERMANOVA table of results* Unique

Source df SS MS Pseudo-F P(perm) perms

Tr 1 3,9541 3,9541 12,146 0,0016 9835

Re 1 0,00072674 0,00072674 0,0014473 0,9665 9823

Si(Re) 39 19,752 0,50646 1,5557 0,0878 9902

TrxRe 1 0,36688 0,36688 1,1269 0,2914 9827

Res 37 12,046 0,32556

Total 79 36,37

**Table 3. Richness**

*PERMANOVA table of results* Unique

Source df SS MS Pseudo-F P(perm) perms

Tr 1 0,40185 0,40185 4,9361 0,0276 9825

Re 1 0,18008 0,18008 1,2412 0,272 9839

Si(Re) 39 5,7188 0,14664 1,8012 0,036 9922

RexTr 1 0,26198 0,26198 3,218 0,0804 9827

Res 37 3,0122 0,08141

Total 79 9,4014

**Table 4. Abundance**

*PERMANOVA table of results* Unique

Source df SS MS Pseudo-F P(perm) perms

Tr 1 4835,6 4835,6 39,086 0,0001 9838

Re 1 2368 2368 10,124 0,0025 9859

Si(Re) 39 9227,5 236,6 1,9125 0,0255 9921

RexTr 1 5,487 5,487 0,044352 0,8331 9837

Res 37 4577,5 123,72

Total 79 21319

**Table 5. Community Biomass**

*PERMANOVA table of results* Unique

Source df SS MS Pseudo-F P(perm) perms

Tr 1 12,104 12,104 20,653 0,0002 9847

Re 1 4,7715 4,7715 5,8469 0,0197 9840

Si(Re) 39 32,046 0,82169 1,402 0,1481 9906

RexTr 1 0,012145 0,012145 0,020723 0,8874 9837

Res 37 21,685 0,58608

Total 79 71,313
